# Supplementary material for: Development and Feasibility Evaluation of a Telerehabilitation Program After Total Knee Arthroplasty: A Cross-sectional Study of Surgeons and Patients
Source: Research Square preprint supplement (doi:10.21203/rs.3.rs-8886676/v1), 2026-02-22
Supplement: Supplementary file 1 [file 72380476db4139df2901ba9e.docx]

Appendix 1

**Basic information about the surgeon and perspectives on the rehabilitation program**

**Question 1:** What is your approximate annual knee replacement volume?

1) <50; 2) 50~100; 3) 101~300 4) >300

**Question 2:** What is the number of years you have been performing knee replacements?

1) <2 years; 2) 3~5 years; 3) 6~10 years; 4) >10 years

**Question 3:** What is your patient's primary form of rehabilitation after discharge?

1) Self-rehabilitation at home + outpatient guidance; 2) Out-of-hospital rehabilitation facility; 3) Rehabilitation outpatient clinic

**Question 4:** In what way do you guide your patients' post-discharge rehabilitation?

1) Verbal explanation; 2) paper materials; 3) Video materials; 4) Online instruction (Internet); 5) Other

**Question 5:** Do you think TKA patients need rehabilitation after surgery?

1) Necessary and in recovery; 2) Necessary, but difficult to implement; 3) Necessary for special patients; 4) Unnecessary

**Question 6:** What is your self-assessment of your knowledge of postoperative rehabilitation after TKA?

1) Very well understood; 2) Better informed; 3) Understood; 4) Don't know much

**Question 7:** Do you think it is necessary to train with sandbag leg press for 5-10 minutes 1-2 weeks after surgery?

1) Necessary; 2) Unnecessary

**Question 8:** Do you think it is necessary to train quadriceps static contraction 1-2 weeks after surgery?

1) Necessary; 2) Unnecessary

**Question 9:** Do you think it is necessary to train hamstring pulling 1-2 weeks after surgery?

1) Necessary; 2) Unnecessary

**Question 10:** Do you think it is necessary to train heel sliding 1-2 weeks after surgery?

1) Necessary; 2) Unnecessary

**Question 11:** Do you think it is necessary to train the seated bedside assisted knee flexion 1-2 weeks after surgery?

1) Necessary; 2) Unnecessary

**Question 12:** Do you think it is necessary to train with band-assisted knee flexion 1-2 weeks after surgery?

1) Necessary; 2) Unnecessary

**Question 13:** Do you think it is necessary to train with a padded ankle pump for 1-2 weeks postoperatively?

1) Necessary; 2) Unnecessary

**Question 14:** Do you think it is necessary to train with a walker leg lift 1-2 weeks after surgery?

1) Necessary; 2) Unnecessary

**Question 15:** Do you think it is necessary to train the contralateral bent knee straight leg raise 1-2 weeks after surgery?

1) Necessary; 2) Unnecessary

**Question 16:** Do you think it is necessary to train supine hip abduction 1-2 weeks after surgery?

1) Necessary; 2) Unnecessary

**Question 17:** Do you think it is necessary to train hip contraction 1-2 weeks after surgery?

1) Necessary; 2) Unnecessary

**Question 18:** Do you think it is necessary to train breathing abdominal exercises 1-2 weeks after surgery?

1) Necessary; 2) Unnecessary

**Question 19:** Do you think it is necessary to apply ice (3-5 times, 10-15 minutes/time) 1-2 weeks after surgery?

1) Necessary; 2) Unnecessary

**Question 20:** Do you think it is necessary to train on the contralateral flexed straight leg raise to straight leg raise at 3-4 weeks postoperatively?

1) Necessary; 2) Unnecessary

**Question 21:** Do you think it is necessary to train in supine hip abduction to standing hip abduction 3-4 weeks after surgery?

1) Necessary; 2) Unnecessary

**Question 22:** Do you think it is necessary to train in seated knee extension 3-4 weeks after surgery?

1) Necessary; 2) Unnecessary

**Question 23:** Do you think it is necessary to train the sitting knee flexor hamstrings 3-4 weeks after surgery?

1) Necessary; 2) Unnecessary

**Question 24:** Do you think it is necessary to train sitting up at 3-4 weeks postoperatively?

1) Necessary; 2) Unnecessary

**Question 25:** Do you think it is necessary to train alternate single knee stance exercises 3-4 weeks postoperatively?

1) Necessary; 2) Unnecessary

**Question 26:** Do you think it is necessary to train standing heel lifts (tiptoe) 3-4 weeks after surgery?

1) Necessary; 2) Unnecessary

**Question 27:** Do you think it is necessary to train single-leg stance with the aid of a walker at 3-4 weeks postoperatively?

1) Necessary; 2) Unnecessary

**Question 28:** Do you think it is necessary to train 30° squat against the wall at 5-6 weeks postoperatively?

1) Necessary; 2) Unnecessary

**Question 29:** Do you think it is necessary to train in the standing position with a rear hooked leg at 5-6 weeks postoperatively?

1) Necessary; 2) Unnecessary

**Question 30:** Do you think it is necessary to train triceps pulling at 5-6 weeks postoperatively?

1) Necessary; 2) Unnecessary

**Question 31:** Do you think it is necessary to train patellar mobility training at 5-6 weeks postoperatively?

1) Necessary; 2) Unnecessary

**Question 32:** Do you think it is necessary to train 45° squat against the wall at 7-12 weeks postoperatively?

1) Necessary; 2) Unnecessary

**Question 33:** Do you think it is necessary to train the standing weight-bearing hip flexion at 7-12 weeks postoperatively?

1) Necessary; 2) Unnecessary

**Question 34:** Do you think it is necessary to train in standing weight-bearing hip abduction 7-12 weeks after surgery?

1) Necessary; 2) Unnecessary

**Question 35:** Do you think it is necessary to train knee extension in sitting position with weight in 7-12 weeks postoperatively?

1) Necessary; 2) Unnecessary

**Question 36:** Do you think it is necessary to train squat training at 7-12 weeks postoperatively?

1) Necessary; 2) Unnecessary
