# Supplementary material for: Development and Feasibility Evaluation of a Telerehabilitation Program After Total Knee Arthroplasty: A Cross-sectional Study of Surgeons and Patients
Source: Research Square preprint supplement (doi:10.21203/rs.3.rs-8886676/v1), 2026-02-22
Supplement: Supplementary file 2 [file fd23ad56f266deeb814e9534.docx]

Appendix 2

**Basic information about the patient and perspectives on the rehabilitation program**

**Question 1:** Patient's name

**Question 2:** Patient's age

1) <60; 2) 60~70; 3)>70

**Question 3:** Patient's gender

1) Male; 2) Female

**Question 4:** Patient's education level

1) Never went to school; 2) Elementary school; 3) Middle School; 4) High School and above

**Question 5:** The patient's usual smartphone use

1) <30min; 2) 30~60min; 3) 1~3 hours; 4) >3 hours

**Question 6:** For "ankle pump training", how many times did the patient need to watch the trainer's video to understand the movements?

1) 1 time; 2) 2 times; 3) 3 times or above; 4) Give up

**Question 7:** For "ankle pump training", whether the patient can independently train according to voice prompts?

1) 1 time; 2) 2 times; 3) 3 times or above; 4) Give up

**Question 8:** "Heel sliding", how many times does the patient need to watch the coaching video in order to understand the movements?

1) 1 time; 2) 2 times; 3) 3 times or above; 4) Give up

**Question 9:** "Heel sliding", whether patients can independently train according to voice prompts?

1) 1 time; 2) 2 times; 3) 3 times or above; 4) Give up

**Question 10:** "Seated bedside assisted knee flexion", how many times does the patient need to watch the coaching video to understand the movement

1) 1 time; 2) 2 times; 3) 3 times or above; 4) Give up

**Question 11:** "Seated bedside assisted knee flexion", can the patient train independently according to the voice prompts?

1) 1 time; 2) 2 times; 3) 3 times or above; 4) Give up

**Question 12:** In "leg lift training with walker", how many times did the patient need to watch the trainer's video to understand the movements?

1) 1 time; 2) 2 times; 3) 3 times or above; 4) Give up

**Question 13:** In the "leg lift training with walker", can the patient train independently according to the voice prompts?

1) 1 time; 2) 2 times; 3) 3 times or above; 4) Give up

**Question 14:** "Seated bedside assisted knee extension", how many times does the patient need to watch the trainer's video to understand the movements?

1) 1 time; 2) 2 times; 3) 3 times or above; 4) Give up

**Question 15:** For the "seated bedside assisted knee extension", could the patient independently train according to the voice prompts?

1) 1 time; 2) 2 times; 3) 3 times or above; 4) Give up

**Question 16:** After the evaluation, did the patient accept this form of rehabilitation instruction?

1) Accept; 2) Unacceptable but can try; 3) Unacceptable

**Question 17:** What are the patient's concerns about this form of rehabilitation?

1) Whether to charge; 2) Can't operate the phone; 3) Too much trouble to wear; 4) Is it safe?

5) Feel no benefit; 6) Other
